# Supplementary material
Source: PubMed Central journal article supplement (PMC4490704)
Supplement: Supp_Figure1.pdf [file Supp_Figure1.pdf]

## Supplementary Data

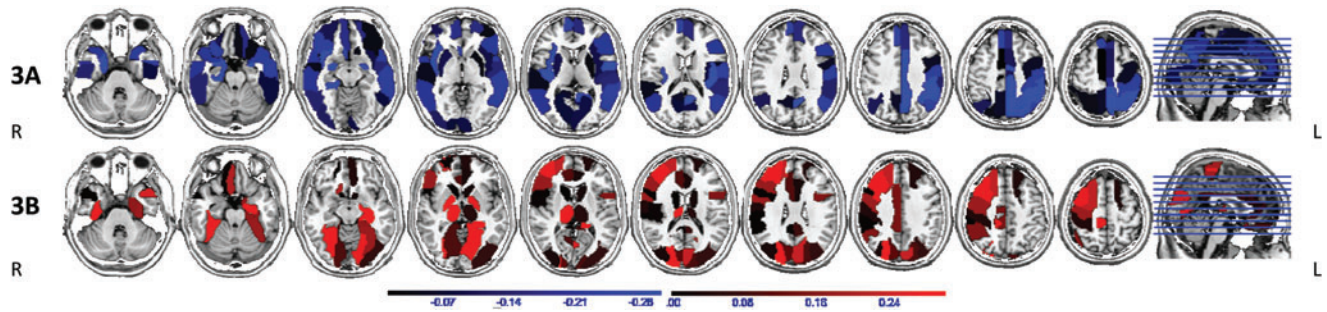

**SUPPLEMENTARY FIG. S1.** Areas of reduced (3A, blue) and increased (3B, red) betweenness centrality associated with duration of epilepsy. This did not have a pattern similar to the regions involved by use of CBZ/OXC (Fig. 2). Orientation is radiological.
