# Supplementary material
Source: PubMed Central journal article supplement (PMC4490704)
Supplement: Supp_Table1.pdf [file Supp_Table1.pdf]

SUPPLEMENTARY TABLE S1. DEFINED DAILY DOSES  
FOR ANTI-EPILEPTIC DRUGS, AS PUBLISHED  
BY THE WHO COLLABORATING CENTER  
FOR DRUG STATISTICS METHODOLOGY 2014

---

| <i>Anti-epileptic drug</i> | <i>Defined daily dose (mg)</i> |
|----------------------------|--------------------------------|
| Carbamazepine              | 1000                           |
| Phenytoin                  | 300                            |
| Lamotrigine                | 300                            |
| Pregabalin                 | 300                            |
| Lacosamide                 | 300                            |
| Topiramate                 | 300                            |
| Levetiracetam              | 1500                           |
| Oxcarbazepine              | 1000                           |
| Felbamate                  | 2400                           |
| Zonisamide                 | 200                            |
| Acetazolamide              | 750                            |
| Valproic acid              | 1500                           |
| Rufinamide                 | 1400                           |

---

Available at [www.whocc.no/atc\\_ddd\\_index/](http://www.whocc.no/atc_ddd_index/)
