# Supplementary material
Source: PubMed Central journal article supplement (PMC4490704)
Supplement: Supp_Table3.pdf [file Supp_Table3.pdf]

SUPPLEMENTARY TABLE S3. MULTIPLE LINEAR REGRESSION OF GLOBAL EFFICIENCY, CLUSTERING COEFFICIENT ( $\gamma$ ), AND SMALL-WORLD INDEX ( $\sigma$ ) ON CBZ/OXC

| <i>Covariate</i>          | <i>Coefficient (95% confidence interval)</i> |                     |                      |
|---------------------------|----------------------------------------------|---------------------|----------------------|
|                           | <i>GE</i>                                    | $\gamma$            | $\sigma$             |
| Gender                    | -0.004 (-0.040, 0.032)                       | 0.01 (-0.41, 0.43)  | 0.13 (-0.22, 0.47)   |
| Age                       | 0.0002 (-0.002, 0.002)                       | -0.01 (-0.04, 0.02) | 0.002 (-0.02, 0.02)  |
| Epilepsy duration (years) | 0.0006 (-0.0006, 0.002)                      | 0.01 (-0.009, 0.03) | 0.005 (-0.006, 0.02) |
| +CBZ/OXC                  | 0.012 (-0.022, 0.046)                        | -0.03 (-0.41, 0.36) | 0.15 (-0.16, 0.45)   |
| TLE laterality (+ RTLE)   | 0.002 (-0.034, 0.038)                        | -0.31 (-0.82, 0.19) | -0.27 (-0.61, 0.06)  |
| Drug load                 | 0.006 (-0.006, 0.019)                        | 0.16 (-0.04, 0.35)  | 0.12 (0.003, 0.24)   |

Omnibus hypothesis was not significant for these models. Parameter estimates and confidence intervals are included only for reference. CBZ/OXC, carbamazepine and oxcarbazepine; GE, global efficiency; RTLE, right temporal lobe epilepsy.
